# Supplementary material for: Using Retinal diagnostics as a Biomarker for Neurodegenerative Diseases: Protocol for a systematic review
Source: bioRxiv or medRxiv preprint supplement (doi:10.1101/2024.05.27.24306765), 2024-05-27
Supplement: Supplementary file [file media-1.pdf]

## Appendix 1. SEARCH STRATEGY FOR WEB OF SCIENCE

**#9 AND #14 and English** (Languages) and **Article** (Document Types) and **Article** (Document Types) and **Human** (Search within all fields) and **Article** (Document Types)

**#9 AND #14 and English** (Languages) and **Article** (Document Types) and **Article** (Document Types) and **Human** (Search within all fields)

**14. #10 OR #11 OR #12 OR #13**

**13. ocular imaging** (All Fields)

**12. optical imaging** (All Fields)

**11. retinal imaging** (All Fields)

**10. retinal imaging dementia** (All Fields)

**9. #1 OR #2 OR #3 OR #4 OR #5 OR #6 OR #7 OR #8**

**8. vascular dem\*** (All Fields)

**7. subjective cognitive impair\*** (All Fields)

**6. subjective cognitive dis\*** (All Fields)

**5. frontotemporal dem\*** (All Fields)

**4. mild cognitive impair\*** (All Fields)

**3. neurodegen\*** (All Fields)

**2. alzheimer\*** (All Fields)

**1. dementia** (All Fields)
